# Supplementary material for: New Measurement Methods of Network Robustness and Response Ability via Microarray Data
Source: PLoS One. 2013 Jan 28;8(1):e55230. doi: 10.1371/journal.pone.0055230 (PMC3557243; doi:10.1371/journal.pone.0055230)
Supplement: Text S3 — Proof of Proposition 1. (DOC) [file pone.0055230.s003.doc]

**Text S3. Proof of Proposition 1**

Let us denote the Lyapunov (energy) function of perturbative gene regulatory network in equation (8) as , for some symmetric positive definite matrix .

Based on quadratic stability , if the LMI in (9) holds, then the perturbative network is robustly stable.
