# Supplementary material for: New Measurement Methods of Network Robustness and Response Ability via Microarray Data
Source: PLoS One. 2013 Jan 28;8(1):e55230. doi: 10.1371/journal.pone.0055230 (PMC3557243; doi:10.1371/journal.pone.0055230)
Supplement: Text S6 — Proof of Proposition 4. (DOC) [file pone.0055230.s006.doc]

**Text S6. Proof of Proposition 4**

Following the proof in Text S4, we choose Lyapunov , for some symmetric positive definite matrix . We have

If the following inequality holds:

(A10)

then, we get

So we sum the above inequality from 0 to ∞ to get

If the in the case , then the inequality in (A11) should be modified as

(A12)

The above results hold only when the inequality (A10) holds, i.e., the following inequality holds:

The above inequality is equivalent to the following inequality

The inequality (A13) for all and if and only if the following LMIs hold
